# Supplementary material for: Effects of Oil and Processing Conditions on Formation of Heterocyclic Amines and Polycyclic Aromatic Hydrocarbons in Pork Fiber
Source: MDPI journal article supplement (doi:10.3390/foods12183504), 2023-09-20
Supplement: s1 [file s1]

*Supplementary material for*

**Effects of Oil and Processing Conditions on Formation of Heterocyclic Amines and Polycyclic Aromatic Hydrocarbons in Pork Fiber**

**Yu-Wen Lai<sup>1</sup>, Baskaran Stephen Inbaraj<sup>1</sup>, Bing-Huei Chen<sup>1,2\*</sup>**

<sup>1</sup>Department of Food Science, Fu Jen Catholic University, New Taipei City 242062, Taiwan.

<sup>2</sup>Department of Nutrition, China Medical University, Taichung 40402, Taiwan.

\*To whom correspondence should be addressed

Email address: 002622@mail.fju.edu.tw

Phone: +886-2-29053626

## Materials and methods

### Materials and reagents

The raw pork tenderloin (1 kg) was procured from a local supermarket located in Xinzhuang District (New Taipei City, Taiwan). The standards of 24 PAHs as listed in Table S2 were purchased from Sigma-Aldrich Co (St. Louis, MO, USA), while the standards of 21 HAs as listed in Table S1 were from Toronto Research Chemicals (Downsview, Ontario, Canada). Both UR-EX extraction and UR-CLEAN-II purification kits for QuEChERS extraction were obtained from Yu-Ho Co. (New Taipei City, Taiwan). A Milli-Q water purification system from Millipore Co. (Bedford, MA, USA) supplied deionized water for dilution purposes. For PAHs separation, a DB-5 MS capillary column with dimensions 30 m x 0.25 mm ID and 0.25  $\mu$ m film thickness was supplied by Agilent Technologies Co (Palo Alto, CA, USA) and an Acquity UPLC BEH C18 column with dimensions 100 x 2.1 mm ID and 1.7  $\mu$ m particle size was obtained from Waters Co (Milford, MA, USA) for HAs separation. The solvents for HPLC use including acetone, hexane, acetonitrile, and methanol were obtained from Merck Co. (Darmstadt, Germany).

**Table S1.** Retention time and selected reaction monitoring (SRM) detection parameters of 20 HAs and internal standard (4,7,8-TriMeIQx) by UPLC-MS/MS.

| HA compound                                                                                     | Retention time (min.) | Precursor ion (m/z) | Quantitation      |                       | Confirmation      |                       |
|-------------------------------------------------------------------------------------------------|-----------------------|---------------------|-------------------|-----------------------|-------------------|-----------------------|
|                                                                                                 |                       |                     | Product ion (m/z) | Collision Energy (eV) | Product ion (m/z) | Collision Energy (eV) |
| 2-amino-1,6-dimethylimidazo[4,5-b]-pyridine (DMIP)                                              | 0.65                  | 163.1               | 148.1             | 24                    | 105.09            | 37                    |
| 2-aminodipyrido-[1,2-a:3',2'-d]imidazole (Glu-P-2)                                              | 1.13                  | 185.1               | 158.1             | 25                    | 78.05             | 37                    |
| 2-amino-1-methyl-imidazo[4,5-f]-quinoline (iso-IQ)                                              | 2.70                  | 199.09              | 184.12            | 25                    | 156.10            | 21                    |
| 2-amino-3-methyl-imidazo[4,5-f]-quinoline (IQ)                                                  | 2.71                  | 199.1               | 184.12            | 27                    | 157.00            | 29                    |
| 2-amino-3-methyl-imidazo[4,5-f]-quinoxaline (IQx)                                               | 2.72                  | 200.08              | 185.12            | 28                    | 132.14            | 29                    |
| 2-amino-3,4-dimethyl-imidazo[4,5-f]- quinoline (MeIQ)                                           | 2.49                  | 213.11              | 198.09            | 27                    | 145.15            | 29                    |
| 2-amino-6-methyldipyrido-[1,2-a:3',2'-d] imidazole (Glu-P-1)                                    | 2.68                  | 199.1               | 92.1              | 36                    | 172.14            | 26                    |
| 2-amino-3,8-dimethyl-imidazo[4,5-f]- quinoxaline (8-MeIQx)                                      | 2.65                  | 214.1               | 131.07            | 41                    | 173.18            | 24                    |
| 2-amino-1-methyl-imidazo[4,5-b]-quinoline (IQ[4,5-b])                                           | 2.71                  | 199.11              | 183.92            | 27                    | 115.19            | 46                    |
| 2-amino-1,6-dimethyl-furo[3,2-e]imidazo[4,5-b]-pyridine (IFP)                                   | 2.80                  | 203.08              | 188.17            | 25                    | 175.14            | 22                    |
| 2-amino-3,7,8-trimethyl-imidazo[4,5-f]- quinoxaline (7,8-DiMeIQx)                               | 2.76                  | 228.1               | 131.13            | 40                    | 187.15            | 25                    |
| 2-amino-3,4,8-trimethyl-imidazo[4,5-f]- quinoxaline (4,8-DiMeIQx)                               | 2.77                  | 228.1               | 213.09            | 26                    | 187.09            | 23                    |
| 9H-pyrido[3,4-b]indole (Norharman)                                                              | 2.82                  | 169.06              | 115.09            | 33                    | 89.05             | 48                    |
| 2-amino-3,4,7,8-tetramethyl-imidazo[4,5-f]-quinoxaline (4,7,8-TriMeIQx) (IS, internal standard) | 2.85                  | 242.13              | 145.09            | 42                    | 201.21            | 26                    |
| 1-methyl-9H-pyrido[3,4-b]indole (Harman)                                                        | 2.80                  | 183.09              | 115.15            | 34                    | 89.09             | 49                    |
| 2-amino-5-phenylpyridine (Phe-P-1)                                                              | 3.02                  | 171.09              | 127.13            | 30                    | 154.07            | 21                    |
| 3-amino-1-methyl-5H-pyrido[4,3-b]indole (Trp-P-2)                                               | 2.94                  | 198.11              | 154.14            | 30                    | 181.08            | 24                    |
| 2-amino-1-methyl-6-phenylimidazo[4,5-b]- pyridine (PhIP)                                        | 3.05                  | 225.1               | 210.05            | 30                    | 140.08            | 54                    |
| 3-amino-1,4-dimethyl-5H-pyrido[4,3-b]indole (Trp-P-1)                                           | 2.98                  | 212.12              | 195.14            | 24                    | 168.09            | 30                    |
| 2-amino-9H-pyrido[2,3-b]indole (AαC)                                                            | 3.11                  | 184.07              | 140.13            | 33                    | 167.07            | 24                    |
| 2-amino-3-methyl-9H-pyrido[2,3-b]indole (MeAαC)                                                 | 3.22                  | 198.1               | 181.14            | 23                    | 127.13            | 38                    |

**Table S2.** Retention time and selected reaction monitoring (SRM) detection parameters of 23 PAHs and internal standard (Triphenylene) by GC-MS/MS.

| PAH compound                         | Retention time (min) | Quantitative ion pair             |                       | Qualitative ion pair              |                       |
|--------------------------------------|----------------------|-----------------------------------|-----------------------|-----------------------------------|-----------------------|
|                                      |                      | Precursor ion > Product ion (m/z) | Collision energy (eV) | Precursor ion > Product ion (m/z) | Collision energy (eV) |
| Naphthalene (NaP)                    | 7.90                 | 128 > 102                         | 20                    | 128 > 78                          | 25                    |
| Acenaphthylene (AcPy)                | 14.5                 | 152 > 151                         | 20                    | 152 > 150                         | 35                    |
| Acenaphthene (AcP)                   | 15.6                 | 154 > 153                         | 20                    | 153 > 152                         | 20                    |
| Fluorene (Flu)                       | 17.6                 | 166 > 165                         | 20                    | 165 > 164                         | 25                    |
| Phenanthrene (Phe)                   | 21.8                 | 178 > 176                         | 35                    | 178 > 152                         | 25                    |
| Anthracene (Ant)                     | 22.1                 | 178 > 176                         | 35                    | 178 > 152                         | 25                    |
| Fluoranthene (FL)                    | 27.9                 | 202 > 200                         | 40                    | 202 > 201                         | 25                    |
| Pyrene (Pyr)                         | 29.7                 | 202 > 200                         | 40                    | 202 > 201                         | 25                    |
| Triphenylene (IS, internal standard) | 41.1                 | 228 > 226                         | 30                    | 113 > 112                         | 10                    |
| Benzo[c]fluorene (BcF)               | 33.1                 | 216 > 215                         | 20                    | 215 > 213                         | 30                    |
| Benzo[a]anthracene (BaA)             | 41.3                 | 228 > 226                         | 35                    | 113 > 112                         | 15                    |
| Chrysene (CHR)                       | 41.6                 | 228 > 226                         | 35                    | 228 > 227                         | 20                    |
| 5-methylchrysene (MCH)               | 47.5                 | 242 > 241                         | 40                    | 242 > 239                         | 15                    |
| Benzo[b]fluoranthene (BbF)           | 55.6                 | 252 > 250                         | 40                    | 125 > 124                         | 15                    |
| Benzo[j]fluoranthene (BjF)           | 55.8                 | 252 > 250                         | 40                    | 125 > 124                         | 15                    |
| Cyclopenta[c,d]pyrene (CcdP)         | 58.6                 | 226 > 224                         | 45                    | 113 > 112                         | 15                    |
| Benzo[a]pyrene (BaP)                 | 61.2                 | 252 > 250                         | 20                    | 125 > 124                         | 40                    |
| Indeno[1,2,3-cd]pyrene (IP)          | 70.8                 | 276 > 274                         | 45                    | 137 > 136                         | 15                    |
| Dibenzo[a,h]anthracene (DBahA)       | 70.9                 | 278 > 276                         | 40                    | 276 > 274                         | 45                    |
| Benzo[ghi]perylene (BghiP)           | 71.1                 | 276 > 274                         | 45                    | 138 > 137                         | 15                    |
| Dibenzo[a,l]pyrene (DBalP)           | 74.9                 | 302 > 300                         | 40                    | 150 > 149                         | 20                    |
| Dibenzo[a,e]pyrene (DBaeP)           | 75.9                 | 302 > 300                         | 40                    | 150 > 149                         | 20                    |
| Dibenzo[a,i]pyrene (DBaiP)           | 76.4                 | 302 > 300                         | 40                    | 150 > 149                         | 20                    |
| Dibenzo[a,h]pyrene (DBahP)           | 76.8                 | 302 > 300                         | 40                    | 150 > 149                         | 20                    |
